# Supplementary material for: Association of Plasma Concentration of Vitamin B12 With All-Cause Mortality in the General Population in the Netherlands
Source: PubMed Central journal article supplement (PMC6991261; doi:10.1001/jamanetworkopen.2019.19274), 2020-01-15
Supplement: jamanetwopen-3-e1919274-s001.pdf [file jamanetwopen-3-e1919274-s001.pdf]

## Supplementary Online Content

Flores-Guerrero JL, Minović I, Groothof D, et al. Association of plasma concentration of vitamin B<sub>12</sub> with all-cause mortality in the general population in the Netherlands. *JAMA Netw Open*. 2020;3(1):e1919274. doi:10.1001/jamanetworkopen.2019.19274

**eTable 1.** Multivariable Linear Regression Analyses With Plasma Concentration of Vitamin B<sub>12</sub> as the Dependent Variable

**eTable 2.** Prospective Associations of Plasma Concentration of Vitamin B<sub>12</sub> With Risk of All-Cause Mortality After Excluding Individuals With History of Cardiovascular Disease

**eTable 3.** Prospective Associations of Plasma Concentration of Vitamin B<sub>12</sub> With Risk of All-Cause Mortality After Excluding Individuals With History of Cancer

**eTable 4.** Prospective Associations of Plasma Concentration of Vitamin B<sub>12</sub> With Risk of All-Cause Mortality After Excluding Individuals With Low Plasma Concentrations Vitamin B<sub>12</sub>

**eTable 5.** Prospective Associations of Plasma Concentration of Vitamin B<sub>12</sub> With Risk of All-Cause Mortality After Excluding Individuals With High Plasma Concentrations Homocysteine

**eTable 6.** Prospective Associations of Plasma Concentration of Vitamin B<sub>12</sub> With Risk of All-Cause Mortality in All Individuals With Available Information

**eTable 7.** Prospective Associations of Plasma Concentration of Vitamin B<sub>12</sub> With Risk of All-Cause Mortality After Excluding Individuals With Mild to Moderated Loss of Kidney Function

**eTable 8.** Prospective Associations of Plasma Concentration of Vitamin B<sub>12</sub> With Risk of All-Cause Mortality in a Design-Based Analysis

**eTable 9.** All-Cause Mortality Relative Risks for Each Stratum of Smoking Behavior

**eTable 10.** All-Cause Mortality Relative Risks for Each Stratum of Alcohol Consumption Behavior

**eTable 11.** All-Cause Mortality Relative Risks for Each Stratum of Age

**eTable 12.** Prospective Associations of Plasma Concentration of Vitamin B<sub>12</sub> With Risk of Cancer Mortality

**eTable 13.** Prospective Associations of Plasma Concentration of Vitamin B<sub>12</sub> With Risk of Cardiovascular Mortality

This supplementary material has been provided by the authors to give readers additional information about their work.

**eTable 1.** Multivariable Linear Regression Analyses With Plasma Concentration of Vitamin B<sub>12</sub> as the Dependent Variable

| Variables                       | b       | b (95% CI)       | β     | β (95% CI)     | P-value   |
|---------------------------------|---------|------------------|-------|----------------|-----------|
| Sex                             | 0.92    | [-9.97, 11.81]   | 0.00  | [-0.04, 0.05]  | 0.86      |
| Age                             | 0.14    | [-0.35, 0.63]    | 0.01  | [-0.04, 0.06]  | 0.58      |
| Ethnicity                       | -10.49  | [-29.20, 8.22]   | -0.02 | [-0.05, 0.01]  | 0.27      |
| Education (high)                | 0.74    | [-7.89, 9.38]    | 0.00  | [-0.03, 0.04]  | 0.86      |
| BMI, kg/m <sup>2</sup>          | -0.58   | [-1.59, 0.43]    | -0.02 | [-0.06, 0.02]  | 0.26      |
| DBP, mm Hg                      | -0.16   | [-0.48, 0.17]    | -0.03 | [-0.08, 0.03]  | 0.35      |
| SBP, mm Hg                      | 0.62    | [-0.02, 1.25]    | 0.05  | [0.00, 0.10]   | 0.05      |
| Parental history of CKD         | -7.70   | [-55.20, 39.80]  | -0.01 | [-0.04, 0.03]  | 0.75      |
| Parental history of T2D         | -1.92   | [-11.97, 8.14]   | -0.01 | [-0.04, 0.03]  | 0.70      |
| T2D                             | 5.47    | [-16.78, 27.71]  | 0.01  | [-0.03, 0.05]  | 0.62      |
| Cancer history                  | 2.40    | [-15.54, 20.34]  | 0.00  | [-0.03, 0.04]  | 0.79      |
| CVD history                     | 1.48    | [-16.45, 19.40]  | 0.00  | [-0.03, 0.04]  | 0.87      |
| Smoking                         | -0.59   | [-3.98, 2.80]    | -0.01 | [-0.04, 0.03]  | 0.73      |
| Alcohol intake                  | -3.93   | [-9.60, 1.74]    | -0.02 | [-0.06, 0.01]  | 0.17      |
| Antihypertensive drugs          | 8.63    | [-2.11, 19.37]   | 0.03  | [-0.01, 0.07]  | 0.11      |
| Lipid-lowering drugs            | 15.42   | [0.60, 30.25]    | 0.04  | [0.01, 0.07]   | 0.04*     |
| Ferritin, (μg/L)                | 0.05    | [0.01, 0.08]     | 0.05  | [0.02, 0.09]   | 0.005**   |
| Transferrin, (g/L)              | -12.62  | [-22.66, -2.58]  | -0.04 | [-0.08, -0.01] | 0.01*     |
| Hemoglobin, mmol/L              | 23.95   | [5.85, 42.04]    | 0.15  | [0.04, 0.27]   | 0.009**   |
| Hematocrit, (%)                 | -333.02 | [-695.34, 29.30] | -0.10 | [-0.21, 0.01]  | 0.07      |
| MCV, (fL)                       | -2.18   | [-3.11, -1.25]   | -0.09 | [-0.12, -0.05] | <0.001*** |
| Homocysteine, (μmol/L)          | -9.02   | [-10.00, -8.04]  | -0.34 | [-0.38, -0.30] | <0.001*** |
| TC, mmol/L                      | 2.60    | [-1.60, 6.79]    | 0.02  | [-0.01, 0.06]  | 0.22      |
| HDL-C, mmol/L                   | 32.88   | [17.58, 48.18]   | 0.09  | [0.05, 0.13]   | <0.001*** |
| TG, mmol/L                      | -5.60   | [-10.73, -0.47]  | -0.04 | [-0.08, -0.00] | 0.03*     |
| Glucose, mmol/L                 | 3.04    | [-1.69, 7.76]    | 0.03  | [-0.02, 0.07]  | 0.20      |
| CRP, mg/L                       | 0.26    | [-0.44, 0.95]    | 0.01  | [-0.02, 0.05]  | 0.47      |
| eGFR, mL/min/1.73m <sup>2</sup> | -0.78   | [-1.11, -0.46]   | -0.11 | [-0.16, -0.07] | <0.001*** |
| UAE, mg/24h                     | 0.01    | [-0.01, 0.04]    | 0.02  | [-0.01, 0.05]  | 0.28      |
| ALT, (U/L)                      | 0.66    | [0.23, 1.09]     | 0.08  | [0.03, 0.13]   | 0.002**   |
| AST, (U/L)                      | 0.74    | [0.05, 1.42]     | 0.05  | [0.01, 0.10]   | 0.03*     |
| ALP, (U/L)                      | 0.18    | [-0.03, 0.38]    | 0.03  | [0.00, 0.07]   | 0.08      |
| GGT, (U/L)                      | 0.20    | [0.06, 0.33]     | 0.06  | [0.02, 0.10]   | 0.005**   |

Standardized (β) and unstandardized (b) regression coefficients are shown. Significance codes: ‘\*\*\*’: < 0.001; ‘\*\*’: < 0.01; ‘\*’: < 0.05.

**eTable 2.** Prospective Associations of Plasma Concentration of Vitamin B<sub>12</sub> With Risk of All-Cause Mortality After Excluding Individuals With History of Cardiovascular Disease

|                        | Vitamin B <sub>12</sub> Per 1 SD Increment |                 | Q1    | Q2+Q3            |                 | Q4               |                 |
|------------------------|--------------------------------------------|-----------------|-------|------------------|-----------------|------------------|-----------------|
| Participants, <i>n</i> | 5202                                       |                 | 1286  | 2607             |                 | 1309             |                 |
| Events, <i>n</i>       | 167                                        |                 | 29    | 83               |                 | 55               |                 |
|                        | HR (95 % CI)                               | <i>P</i> -Value |       | HR (95 % CI)     | <i>P</i> -Value | HR (95 % CI)     | <i>P</i> -Value |
| Crude Model            | 1.32 [1.13;1.53]                           | <0.001          | (ref) | 1.40 [0.91;2.13] | 0.12            | 1.84 [1.17;2.88] | 0.007           |
| Model 1                | 1.32 [1.13;1.55]                           | <0.001          | (ref) | 1.37 [0.90;2.09] | 0.14            | 1.83 [1.16;2.87] | 0.008           |
| Model 2                | 1.35 [1.14;1.59]                           | < 0.001         | (ref) | 1.29 [0.83;2.00] | 0.25            | 1.86 [1.15;2.98] | 0.01            |
| Model 3                | 1.42 [1.20;1.69]                           | < 0.001         | (ref) | 1.40 [0.88;2.22] | 0.15            | 2.05 [1.24;3.38] | 0.005           |
| Model 4                | 1.40 [1.17;1.67]                           | < 0.001         | (ref) | 1.38 [0.86;2.22] | 0.18            | 1.93 [1.16;3.23] | 0.01            |
| Model 5                | 1.40 [1.17;1.67]                           | < 0.001         | (ref) | 1.36 [0.85;2.18] | 0.20            | 1.90 [1.13;3.18] | 0.01            |
| Model 6                | 1.42 [1.18;1.71]                           | < 0.001         | (ref) | 1.43 [0.87;2.37] | 0.16            | 2.13 [1.23;3.69] | 0.006           |
| Model 7                | 1.41 [1.17;1.71]                           | < 0.001         | (ref) | 1.44 [0.87;2.37] | 0.15            | 2.12 [1.22;3.68] | 0.007           |

Data are presented as hazard ratios (HRs) with 95% confidence intervals (CIs). For HR of Vitamin B<sub>12</sub> per 1 SD increment, data was log<sub>e</sub> transformed.

Model 1: Model adjusted for age and sex

Model 2: Model 1 + ethnicity + BMI + T2D + Smoking status (never, past, current) + Alcohol consumption (<1, 1-7,>7 drinks/week) + Education (low, medium, high) + SBP + homocysteine

Model 3: Model 2 + ferritin + hemoglobin + MCV

Model 4: Model 3 + TC / HDL-C ratio + glucose

Model 5: Model 4 + cancer history

Model 6: Model 5 + eGFR + UAE

Model 7: Model 6 + ALT + AST + ALP + GGT

**eTable 3.** Prospective Associations of Plasma Concentration of Vitamin B<sub>12</sub> With Risk of All-Cause Mortality After Excluding Individuals With History of Cancer

|                        | Vitamin B <sub>12</sub> Per 1 SD Increment |                 | Q1    | Q2+Q3            |                 | Q4               |                 |
|------------------------|--------------------------------------------|-----------------|-------|------------------|-----------------|------------------|-----------------|
| Participants, <i>n</i> | 5308                                       |                 | 1319  | 2655             |                 | 1334             |                 |
| Events, <i>n</i>       | 203                                        |                 | 36    | 101              |                 | 66               |                 |
|                        | HR (95 % CI)                               | <i>P</i> -Value |       | HR (95 % CI)     | <i>P</i> -Value | HR (95 % CI)     | <i>P</i> -Value |
| Crude Model            | 1.21 [1.06;1.39]                           | 0.006           | (ref) | 1.38 [0.94;2.02] | 0.09            | 1.79 [1.19;2.69] | 0.004           |
| Model 1                | 1.21 [1.05;1.39]                           | 0.008           | (ref) | 1.37 [0.93;2.00] | 0.10            | 1.75 [1.17;2.63] | 0.007           |
| Model 2                | 1.25 [1.07;1.44]                           | 0.003           | (ref) | 1.35 [0.91;1.99] | 0.13            | 1.91 [1.25;2.92] | 0.002           |
| Model 3                | 1.25 [1.07;1.47]                           | 0.005           | (ref) | 1.42 [0.93;2.15] | 0.10            | 1.84 [1.17;2.92] | 0.008           |
| Model 4                | 1.25 [1.06;1.47]                           | 0.007           | (ref) | 1.42 [0.93;2.17] | 0.10            | 1.81 [1.13;2.87] | 0.01            |
| Model 5                | 1.23 [1.05;1.45]                           | 0.01            | (ref) | 1.40 [0.92;2.13] | 0.12            | 1.75 [1.10;2.80] | 0.01            |
| Model 6                | 1.23 [1.04;1.46]                           | 0.01            | (ref) | 1.46 [0.93;2.27] | 0.09            | 1.90 [1.16;3.11] | 0.01            |
| Model 7                | 1.23 [1.04;1.46]                           | 0.01            | (ref) | 1.45 [0.93;2.27] | 0.09            | 1.91 [1.16;3.13] | 0.01            |

Data are presented as hazard ratios (HRs) with 95% confidence intervals (CIs). For HR of Vitamin B<sub>12</sub> per 1 SD increment, data was log<sub>e</sub> transformed.

Model 1: Model adjusted for age and sex

Model 2: Model 1 + ethnicity + BMI + T2D + Smoking status (never, past, current) + Alcohol consumption (<1, 1-7,>7 drinks/week) + Education (low, medium, high) + SBP + homocysteine

Model 3: Model 2 + ferritin + hemoglobin + MCV

Model 4: Model 3 + TC / HDL-C ratio + glucose

Model 5: Model 4 + CVD history

Model 6: Model 5 + eGFR + UAE

Model 7: Model 6 + ALT + AST + ALP + GGT

**eTable 4.** Prospective Associations of Plasma Concentration of Vitamin B<sub>12</sub> With Risk of All-Cause Mortality After Excluding Individuals With Low Plasma Concentrations Vitamin B<sub>12</sub>

|                        | Vitamin B <sub>12</sub> Per 1 SD Increment |                 | Q1    | Q2+Q3            |                 | Q4               |                 |
|------------------------|--------------------------------------------|-----------------|-------|------------------|-----------------|------------------|-----------------|
| Participants, <i>n</i> | 5376                                       |                 | 1344  | 2685             |                 | 1347             |                 |
| Events, <i>n</i>       | 217                                        |                 | 36    | 111              |                 | 70               |                 |
|                        | HR (95 % CI)                               | <i>P</i> -Value |       | HR (95 % CI)     | <i>P</i> -Value | HR (95 % CI)     | <i>P</i> -Value |
| Crude Model            | 1.27 [1.12;1.45]                           | <0.001          | (ref) | 1.52 [1.04;2.21] | 0.02            | 1.91 [1.28;2.86] | 0.001           |
| Model 1                | 1.26 [1.11;1.44]                           | <0.001          | (ref) | 1.47 [1.01;2.14] | 0.04            | 1.87 [1.25;2.80] | 0.002           |
| Model 2                | 1.29 [1.13;1.48]                           | < 0.001         | (ref) | 1.48 [1.01;2.19] | 0.04            | 2.00 [1.31;3.05] | 0.001           |
| Model 3                | 1.29 [1.12;1.50]                           | < 0.001         | (ref) | 1.47 [0.98;2.21] | 0.06            | 1.87 [1.19;2.93] | 0.006           |
| Model 4                | 1.28 [1.10;1.48]                           | 0.001           | (ref) | 1.45 [0.96;2.17] | 0.07            | 1.79 [1.14;2.81] | 0.01            |
| Model 5                | 1.26 [1.08;1.46]                           | 0.002           | (ref) | 1.43 [0.96;2.15] | 0.08            | 1.75 [1.11;2.76] | 0.01            |
| Model 6                | 1.28 [1.09;1.49]                           | 0.002           | (ref) | 1.46 [0.95;2.26] | 0.08            | 1.93 [1.19;3.12] | 0.007           |
| Model 7                | 1.28 [1.10;1.50]                           | 0.001           | (ref) | 1.44 [0.93;2.22] | 0.09            | 1.93 [1.19;3.13] | 0.007           |

Data are presented as hazard ratios (HRs) with 95% confidence intervals (CIs). For HR of Vitamin B<sub>12</sub> per 1 SD increment, data was log<sub>e</sub> transformed.

Model 1: Model adjusted for age and sex

Model 2: Model 1 + ethnicity + BMI + T2D + Smoking status (never, past, current) + Alcohol consumption (<1, 1-7,>7 drinks/week) + Education (low, medium, high) + SBP + homocysteine

Model 3: Model 2 + ferritin + hemoglobin + MCV

Model 4: Model 3 + TC / HDL-C ratio + glucose

Model 5: Model 4 + cancer history + CVD history

Model 6: Model 5 + eGFR + UAE

Model 7: Model 6 + ALT + AST + ALP + GGT

**eTable 5.** Prospective Associations of Plasma Concentration of Vitamin B<sub>12</sub> With Risk of All-Cause Mortality After Excluding Individuals With High Plasma Concentrations Homocysteine

|                        | Vitamin B <sub>12</sub> Per 1 SD Increment |                 | Q1    | Q2+Q3            |                 | Q4               |                 |
|------------------------|--------------------------------------------|-----------------|-------|------------------|-----------------|------------------|-----------------|
| Participants, <i>n</i> | 4222                                       |                 | 1055  | 2105             |                 | 1062             |                 |
| Events, <i>n</i>       | 120                                        |                 | 17    | 63               |                 | 40               |                 |
|                        | HR (95 % CI)                               | <i>P</i> -Value |       | HR (95 % CI)     | <i>P</i> -Value | HR (95 % CI)     | <i>P</i> -Value |
| Crude Model            | 1.38 [1.16;1.65]                           | <0.001          | (ref) | 1.85 [1.08;3.15] | 0.02            | 2.33 [1.32;4.11] | 0.003           |
| Model 1                | 1.26 [1.05;1.51]                           | 0.01            | (ref) | 1.47 [0.86;2.51] | 0.15            | 1.79 [1.01;3.16] | 0.04            |
| Model 2                | 1.23 [1.03;1.48]                           | 0.02            | (ref) | 1.43 [0.84;2.46] | 0.18            | 1.73 [0.98;3.06] | 0.06            |
| Model 3                | 1.24 [1.02;1.51]                           | 0.03            | (ref) | 1.22 [0.71;2.12] | 0.47            | 1.57 [0.87;2.84] | 0.13            |
| Model 4                | 1.23 [1.00;1.50]                           | 0.04            | (ref) | 1.23 [0.71;2.13] | 0.45            | 1.52 [0.84;2.77] | 0.17            |
| Model 5                | 1.21 [0.99;1.48]                           | 0.04            | (ref) | 1.24 [0.72;2.15] | 0.44            | 1.46 [0.80;2.66] | 0.21            |
| Model 6                | 1.24 [1.01;1.53]                           | 0.03            | (ref) | 1.25 [0.71;2.21] | 0.43            | 1.58 [0.85;2.93] | 0.14            |
| Model 7                | 1.25 [1.02;1.54]                           | 0.03            | (ref) | 1.27 [0.72;2.25] | 0.41            | 1.64 [0.88;3.05] | 0.12            |

Data are presented as hazard ratios (HRs) with 95% confidence intervals (CIs). For HR of Vitamin B<sub>12</sub> per 1 SD increment, data was log<sub>e</sub> transformed.

Model 1: Model adjusted for age and sex

Model 2: Model 1 + ethnicity + BMI + T2D + Smoking status (never, past, current) + Alcohol consumption (<1, 1-7,>7 drinks/week) + Education (low, medium, high) + SBP

Model 3: Model 2 + ferritin + hemoglobin + MCV

Model 4: Model 3 + TC / HDL-C ratio + glucose

Model 5: Model 4 + cancer history + CVD history

Model 6: Model 5 + eGFR + UAE

Model 7: Model 6 + ALT + AST + ALP + GGT

**eTable 6.** Prospective Associations of Plasma Concentration of Vitamin B<sub>12</sub> With Risk of All-Cause Mortality in All Individuals With Available Information

|                        | Vitamin B <sub>12</sub> Per 1 SD Increment |                 | Q1    | Q2+Q3            |                 | Q4               |                 |
|------------------------|--------------------------------------------|-----------------|-------|------------------|-----------------|------------------|-----------------|
| Participants, <i>n</i> | 5629                                       |                 | 1407  | 2813             |                 | 1409             |                 |
| Events, <i>n</i>       | 233                                        |                 | 44    | 113              |                 | 76               |                 |
|                        | HR (95 % CI)                               | <i>P</i> -Value |       | HR (95 % CI)     | <i>P</i> -Value | HR (95 % CI)     | <i>P</i> -Value |
| Crude Model            | 1.23 [1.08;1.40]                           | 0.001           | (ref) | 1.27 [0.90;1.80] | 0.17            | 1.71 [1.18;2.48] | 0.004           |
| Model 1                | 1.20 [1.06;1.36]                           | 0.004           | (ref) | 1.26 [0.89;1.79] | 0.18            | 1.67 [1.15;2.42] | 0.006           |
| Model 2                | 1.25 [1.09;1.42]                           | 0.001           | (ref) | 1.28 [0.89;1.83] | 0.18            | 1.81 [1.22;2.68] | 0.002           |
| Model 3                | 1.24 [1.08;1.43]                           | 0.002           | (ref) | 1.33 [0.91;1.95] | 0.14            | 1.75 [1.15;2.68] | 0.009           |
| Model 4                | 1.24 [1.07;1.43]                           | 0.003           | (ref) | 1.32 [0.90;1.95] | 0.15            | 1.71 [1.11;2.63] | 0.01            |
| Model 5                | 1.20 [1.04;1.39]                           | 0.01            | (ref) | 1.32 [0.89;1.94] | 0.16            | 1.64 [1.07;2.53] | 0.02            |
| Model 6                | 1.21 [1.04;1.41]                           | 0.01            | (ref) | 1.35 [0.90;2.03] | 0.14            | 1.79 [1.13;2.83] | 0.01            |
| Model 7                | 1.23 [1.05;1.44]                           | 0.009           | (ref) | 1.32 [0.88;1.99] | 0.18            | 1.80 [1.14;2.86] | 0.01            |

Data are presented as hazard ratios (HRs) with 95% confidence intervals (CIs). For HR of Vitamin B<sub>12</sub> per 1 SD increment, data was log<sub>e</sub> transformed.

Model 1: Model adjusted for age and sex.

Model 2: Model 1 + ethnicity + BMI + T2D + Smoking status (never, past, current) + Alcohol consumption (<1, 1-7,>7 drinks/week) + Education (low, medium, high) + SBP

Model 3: Model 2 + ferritin + hemoglobin + MCV.

Model 4: Model 3 + TC/HDL-C ratio + glucose.

Model 5: Model 4 + cancer history + CVD history.

Model 6: Model 5 + eGFR + UAE.

Model 7: Model 6 + ALT + AST + ALP + GGT + B<sub>12</sub> supplementation

**eTable 7.** Prospective Associations of Plasma Concentration of Vitamin B<sub>12</sub> With Risk of All-Cause Mortality After Excluding Individuals With Mild to Moderated Loss of Kidney Function

|                        | Vitamin B <sub>12</sub> Per 1 SD Increment |                 | Q1    | Q2+Q3            |                 | Q4               |                 |
|------------------------|--------------------------------------------|-----------------|-------|------------------|-----------------|------------------|-----------------|
| Participants, <i>n</i> | 5342                                       |                 | 1333  | 2665             |                 | 1344             |                 |
| Events, <i>n</i>       | 180                                        |                 | 34    | 89               |                 | 57               |                 |
|                        | HR (95 % CI)                               | <i>P</i> -Value |       | HR (95 % CI)     | <i>P</i> -Value | HR (95 % CI)     | <i>P</i> -Value |
| Crude Model            | 1.20 [1.04;1.39]                           | 0.01            | (ref) | 1.30 [0.87;1.92] | 0.20            | 1.64 [1.07;2.51] | 0.02            |
| Model 1                | 1.19 [1.03;1.38]                           | 0.01            | (ref) | 1.30 [0.88;1.93] | 0.19            | 1.63 [1.07;2.50] | 0.02            |
| Model 2                | 1.19 [1.01;1.39]                           | 0.03            | (ref) | 1.23 [0.82;1.85] | 0.32            | 1.63 [1.04;2.55] | 0.03            |
| Model 3                | 1.20 [1.02;1.43]                           | 0.03            | (ref) | 1.24 [0.80;1.91] | 0.33            | 1.62 [1.00;2.62] | 0.04            |
| Model 4                | 1.20 [1.01;1.43]                           | 0.03            | (ref) | 1.22 [0.78;1.89] | 0.38            | 1.58 [0.97;2.58] | 0.06            |
| Model 5                | 1.17 [0.99;1.40]                           | 0.06            | (ref) | 1.21 [0.78;1.88] | 0.39            | 1.52 [0.93;2.50] | 0.09            |
| Model 6                | 1.19 [0.99;1.43]                           | 0.06            | (ref) | 1.26 [0.79;2.01] | 0.33            | 1.70 [1.01;2.87] | 0.04            |
| Model 7                | 1.18 [0.98;1.42]                           | 0.07            | (ref) | 1.28 [0.80;2.05] | 0.29            | 1.70 [1.00;2.89] | 0.04            |

Data are presented as hazard ratios (HRs) with 95% confidence intervals (CIs). For HR of Vitamin B<sub>12</sub> per 1 SD increment, data was log<sub>e</sub> transformed.

Model 1: Model adjusted for age and sex.

Model 2: Model 1 + ethnicity + BMI + T2D + Smoking status (never, past, current) + Alcohol consumption (<1, 1-7,>7 drinks/week) + Education (low, medium, high) + SBP + homocysteine.

Model 3: Model 2 + ferritin + hemoglobin + MCV.

Model 4: Model 3 + TC/HDL-C ratio + glucose.

Model 5: Model 4 + cancer history + CVD history.

Model 6: Model 5 + eGFR + UAE.

Model 7: Model 6 + ALT + AST + ALP + GGT.



**eTable 8.** Prospective Associations of Plasma Concentration of Vitamin B<sub>12</sub> With Risk of All-Cause Mortality in a Design-Based Analysis

|                        | Vitamin B <sub>12</sub> Per 1 SD Increment |                 | Q1    | Q2+Q3            |                 | Q4               |                 |
|------------------------|--------------------------------------------|-----------------|-------|------------------|-----------------|------------------|-----------------|
| Participants, <i>n</i> | 5571                                       |                 | 1390  | 2787             |                 | 1394             |                 |
| Events, <i>n</i>       | 226                                        |                 | 41    | 112              |                 | 73               |                 |
|                        | HR (95 % CI)                               | <i>P</i> -Value |       | HR (95 % CI)     | <i>P</i> -Value | HR (95 % CI)     | <i>P</i> -Value |
| Crude Model            | 1.36 [1.17;1.57]                           | <0.001          | (ref) | 1.19 [0.80;1.77] | 0.40            | 2.06 [1.37;3.10] | <0.001          |
| Model 1                | 1.32 [1.14;1.53]                           | <0.001          | (ref) | 1.19 [0.80;1.78] | 0.38            | 1.98 [1.31;2.98] | 0.001           |
| Model 2                | 1.38 [1.18;1.62]                           | <0.001          | (ref) | 1.20 [0.79;1.82] | 0.38            | 2.21 [1.43;3.43] | <0.001          |
| Model 3                | 1.38 [1.17;1.63]                           | <0.001          | (ref) | 1.23 [0.80;1.89] | 0.35            | 2.13 [1.34;3.38] | 0.001           |
| Model 4                | 1.33 [1.12;1.57]                           | 0.001           | (ref) | 1.16 [0.75;1.80] | 0.49            | 1.90 [1.19;3.05] | 0.007           |
| Model 5                | 1.30 [1.10;1.54]                           | 0.002           | (ref) | 1.15 [0.74;1.79] | 0.52            | 1.84 [1.15;2.97] | 0.01            |
| Model 6                | 1.33 [1.12;1.58]                           | 0.001           | (ref) | 1.17 [0.75;1.84] | 0.48            | 2.00 [1.22;3.25] | 0.005           |
| Model 7                | 1.33 [1.12;1.59]                           | 0.001           | (ref) | 1.16 [0.74;1.81] | 0.52            | 2.01 [1.23;3.30] | 0.005           |

Data are presented as hazard ratios (HRs) with 95% confidence intervals (CIs). For HR of Vitamin B<sub>12</sub> per 1 SD increment, data was log<sub>e</sub> transformed.

Model 1: Model adjusted for age and sex.

Model 2: Model 1 + ethnicity + BMI + T2D + Smoking status (never, past, current) + Alcohol consumption (<1, 1-7,>7 drinks/week) + Education (low, medium, high) + SBP + homocysteine

Model 3: Model 2 + ferritin + hemoglobin + MCV.

Model 4: Model 3 + TC/HDL-C ratio + glucose.

Model 5: Model 4 + cancer history + CVD history.

Model 6: Model 5 + eGFR + UAE.

Model 7: Model 6 + ALT + AST + ALP + GGT + B<sub>12</sub> supplementation

**eTable 9.** All-Cause Mortality Relative Risks for Each Stratum of Smoking Behavior

|                                                  | All-cause mortality |       |       | Proportion of deaths<br>(all-cause mortality) (%) |
|--------------------------------------------------|---------------------|-------|-------|---------------------------------------------------|
|                                                  | Dead                | Alive | Total |                                                   |
| <i>All participants<sup>a</sup></i>              |                     |       |       |                                                   |
| Q1 of Vitamin B <sub>12</sub>                    | 41                  | 1349  | 1390  | 2.9                                               |
| Q2+Q3 of Vitamin B <sub>12</sub>                 | 112                 | 2675  | 2787  | 4.0                                               |
| Q4 of Vitamin B <sub>12</sub>                    | 73                  | 1321  | 1394  | 5.2                                               |
| <i>Participants who never smoked<sup>b</sup></i> |                     |       |       |                                                   |
| Q1 of Vitamin B <sub>12</sub>                    | 7                   | 372   | 379   | 1.8                                               |
| Q2+Q3 of Vitamin B <sub>12</sub>                 | 13                  | 765   | 778   | 1.7                                               |
| Q4 of Vitamin B <sub>12</sub>                    | 12                  | 408   | 420   | 2.9                                               |
| <i>Former smokers<sup>c</sup></i>                |                     |       |       |                                                   |
| Q1 of Vitamin B <sub>12</sub>                    | 25                  | 556   | 581   | 4.3                                               |
| Q2+Q3 of Vitamin B <sub>12</sub>                 | 61                  | 1119  | 1180  | 5.2                                               |
| Q4 of Vitamin B <sub>12</sub>                    | 42                  | 575   | 617   | 6.8                                               |
| <i>Current smokers<sup>d</sup></i>               |                     |       |       |                                                   |
| Q1 of Vitamin B <sub>12</sub>                    | 9                   | 400   | 409   | 2.2                                               |
| Q2+Q3 of Vitamin B <sub>12</sub>                 | 37                  | 759   | 796   | 4.6                                               |
| Q4 of Vitamin B <sub>12</sub>                    | 19                  | 323   | 342   | 5.6                                               |

a. Crude Relative Risk=5.2%/2.9%= 1.8.

b. Stratum-specific Relative Risk =2.9%/1.8%= 1.6.

c. Stratum-specific Relative Risk =6.8%/4.3%= 1.6.

d. Stratum-specific Relative Risk =5.6%/2.2%= 2.5.

**eTable 10.** All-Cause Mortality Relative Risks for Each Stratum of Alcohol Consumption Behavior

|                                                                       | All-cause mortality |       |       | Proportion of deaths<br>(all-cause mortality) (%) |
|-----------------------------------------------------------------------|---------------------|-------|-------|---------------------------------------------------|
|                                                                       | Dead                | Alive | Total |                                                   |
| <i>All Participants<sup>a</sup></i>                                   |                     |       |       |                                                   |
| Q1 of Vitamin B <sub>12</sub>                                         | 41                  | 1349  | 1390  | 2.9                                               |
| Q2+Q3 of Vitamin B <sub>12</sub>                                      | 112                 | 2675  | 2787  | 4.0                                               |
| Q4 of Vitamin B <sub>12</sub>                                         | 73                  | 1321  | 1394  | 5.2                                               |
| <i>Participants with alcohol intake &lt;1 drinks/week<sup>b</sup></i> |                     |       |       |                                                   |
| Q1 of Vitamin B <sub>12</sub>                                         | 15                  | 337   | 352   | 4.5                                               |
| Q2+Q3 of Vitamin B <sub>12</sub>                                      | 33                  | 674   | 707   | 4.7                                               |
| Q4 of Vitamin B <sub>12</sub>                                         | 20                  | 345   | 365   | 5.5                                               |
| <i>Participants with alcohol intake = 1-7 drinks/week<sup>c</sup></i> |                     |       |       |                                                   |
| Q1 of Vitamin B <sub>12</sub>                                         | 20                  | 650   | 670   | 3.0                                               |
| Q2+Q3 of Vitamin B <sub>12</sub>                                      | 49                  | 1316  | 1365  | 3.6                                               |
| Q4 of Vitamin B <sub>12</sub>                                         | 28                  | 590   | 618   | 4.5                                               |
| <i>Participants with alcohol intake &gt;7 drinks/week<sup>d</sup></i> |                     |       |       |                                                   |
| Q1 of Vitamin B <sub>12</sub>                                         | 15                  | 337   | 352   | 4.3                                               |
| Q2+Q3 of Vitamin B <sub>12</sub>                                      | 33                  | 674   | 707   | 4.7                                               |
| Q4 of Vitamin B <sub>12</sub>                                         | 20                  | 345   | 365   | 5.5                                               |

a. Crude Relative Risk=5.2%/2.9%= 1.8.

b. Stratum-specific Relative Risk =5.5%/4.5%= 1.2.

c. Stratum-specific Relative Risk =4.5%/3.0%= 1.5.

d. Stratum-specific Relative Risk =5.5%/4.3%= 1.3.

**eTable 11.** All-Cause Mortality Relative Risks for Each Stratum of Age

|                                                    | All-cause mortality |       |       | Proportion of deaths<br>(all-cause mortality) (%) |
|----------------------------------------------------|---------------------|-------|-------|---------------------------------------------------|
|                                                    | Dead                | Alive | Total |                                                   |
| <i>All Participants<sup>a</sup></i>                |                     |       |       |                                                   |
| Q1 of Vitamin B <sub>12</sub>                      | 41                  | 1349  | 1390  | 2.9                                               |
| Q2+Q3 of Vitamin B <sub>12</sub>                   | 112                 | 2675  | 2787  | 4.0                                               |
| Q4 of Vitamin B <sub>12</sub>                      | 73                  | 1321  | 1394  | 5.2                                               |
| <i>Participants &lt;65 years old<sup>b</sup></i>   |                     |       |       |                                                   |
| Q1 of Vitamin B <sub>12</sub>                      | 12                  | 1089  | 1101  | 1.1                                               |
| Q2+Q3 of Vitamin B <sub>12</sub>                   | 31                  | 2184  | 2215  | 1.4                                               |
| Q4 of Vitamin B <sub>12</sub>                      | 20                  | 1061  | 1081  | 1.9                                               |
| <i>Participants with ≥65 years old<sup>c</sup></i> |                     |       |       |                                                   |
| Q1 of Vitamin B <sub>12</sub>                      | 29                  | 260   | 289   | 10.0                                              |
| Q2+Q3 of Vitamin B <sub>12</sub>                   | 81                  | 491   | 572   | 14.2                                              |
| Q4 of Vitamin B <sub>12</sub>                      | 53                  | 260   | 313   | 16.9                                              |

a. Crude Relative Risk=5.2%/2.9%= 1.8.

b. Stratum-specific Relative Risk =1.9%/1.1%= 1.7.

c. Stratum-specific Relative Risk =16.9%/10%= 1.7.

**eTable 12.** Prospective Associations of Plasma Concentration of Vitamin B<sub>12</sub> With Risk of Cancer Mortality

|                        | Vitamin B <sub>12</sub> Per 1 SD Increment |                | Q1    | Q2+Q3            |                | Q4               |                |
|------------------------|--------------------------------------------|----------------|-------|------------------|----------------|------------------|----------------|
| Participants, <i>n</i> | 5571                                       |                | 1390  | 2787             |                | 1394             |                |
| Events, <i>n</i>       | 172                                        |                | 41    | 76               |                | 55               |                |
|                        | HR (95 % CI)                               | <i>P</i> Value |       | HR (95 % CI)     | <i>P</i> Value | HR (95 % CI)     | <i>P</i> Value |
| Crude Model            | 1.14 [0.98;1.33]                           | 0.08           | (ref) | 0.94 [0.64;1.37] | 0.73           | 1.36 [0.91;2.04] | 0.13           |
| Model 1                | 1.13 [0.97;1.31]                           | 0.10           | (ref) | 0.92 [0.63;1.35] | 0.67           | 1.33 [0.88;1.99] | 0.17           |
| Model 2                | 1.12 [0.96;1.32]                           | 0.15           | (ref) | 0.86 [0.58;1.28] | 0.45           | 1.32 [0.86;2.02] | 0.20           |
| Model 3                | 1.12 [0.94;1.33]                           | 0.20           | (ref) | 0.88 [0.58;1.33] | 0.53           | 1.26 [0.80;2.00] | 0.31           |
| Model 4                | 1.10 [0.92;1.31]                           | 0.29           | (ref) | 0.86 [0.56;1.30] | 0.47           | 1.18 [0.74;1.87] | 0.49           |
| Model 5                | 1.09 [0.91;1.30]                           | 0.35           | (ref) | 0.83 [0.55;1.27] | 0.39           | 1.17 [0.73;1.86] | 0.51           |
| Model 6                | 1.11 [0.92;1.33]                           | 0.26           | (ref) | 0.87 [0.57;1.35] | 0.54           | 1.22 [0.75;1.98] | 0.43           |
| Model 7                | 1.13 [0.93;1.36]                           | 0.21           | (ref) | 0.88 [0.57;1.36] | 0.55           | 1.28 [0.78;2.09] | 0.32           |

Data are presented as hazard ratios (HRs) with 95% confidence intervals (CIs). For HR of Vitamin B<sub>12</sub> per 1 SD increment, data was log<sub>e</sub> transformed.

Model 1: Model adjusted for age and sex.

Model 2: Model 1 + ethnicity + BMI + T2D + Smoking status (never, past, current) + Alcohol consumption (<1, 1-7,>7 drinks/week) + Education (low, medium, high) + SBP + homocysteine.

Model 3: Model 2 + ferritin + hemoglobin + MCV.

Model 4: Model 3 + TC/HDL-C ratio + glucose.

Model 5: Model 4 + cancer history + CVD history.

Model 6: Model 5 + eGFR + UAE.

Model 7: Model 6 + ALT + AST + ALP + GGT.

**eTable 13.** Prospective Associations of Plasma Concentration of Vitamin B<sub>12</sub> With Risk of Cardiovascular Mortality

|                        | Vitamin B <sub>12</sub> Per 1 SD Increment |                | Q1    | Q2+Q3            |                | Q4               |                |
|------------------------|--------------------------------------------|----------------|-------|------------------|----------------|------------------|----------------|
| Participants, <i>n</i> | 5571                                       |                | 1390  | 2787             |                | 1394             |                |
| Events, <i>n</i>       | 53                                         |                | 8     | 29               |                | 16               |                |
|                        | HR (95 % CI)                               | <i>P</i> Value |       | HR (95 % CI)     | <i>P</i> Value | HR (95 % CI)     | <i>P</i> Value |
| Crude Model            | 1.20 [0.91;1.57]                           | 0.19           | (ref) | 1.79 [0.82;3.91] | 0.14           | 1.97 [0.84;4.61] | 0.11           |
| Model 1                | 1.20 [0.92;1.58]                           | 0.18           | (ref) | 1.81 [0.83;3.97] | 0.13           | 1.99 [0.85;4.66] | 0.11           |
| Model 2                | 1.24 [0.93;1.66]                           | 0.14           | (ref) | 2.20 [0.97;4.98] | 0.05           | 2.07 [0.80;5.32] | 0.13           |
| Model 3                | 1.21 [0.90;1.64]                           | 0.21           | (ref) | 2.15 [0.94;4.92] | 0.07           | 1.91 [0.72;5.04] | 0.19           |
| Model 4                | 1.20 [0.88;1.62]                           | 0.25           | (ref) | 2.26 [0.97;5.27] | 0.05           | 1.79 [0.66;4.86] | 0.25           |
| Model 5                | 1.16 [0.85;1.59]                           | 0.34           | (ref) | 2.31 [0.98;5.42] | 0.05           | 1.62 [0.58;4.54] | 0.35           |
| Model 6                | 1.07 [0.76;1.51]                           | 0.69           | (ref) | 1.88 [0.79;4.51] | 0.15           | 1.37 [0.46;4.03] | 0.56           |
| Model 7                | 1.06 [0.75;1.51]                           | 0.74           | (ref) | 1.79 [0.74;4.32] | 0.19           | 1.33 [0.45;3.95] | 0.60           |

Data are presented as hazard ratios (HRs) with 95% confidence intervals (CIs). For HR of Vitamin B<sub>12</sub> per 1 SD increment, data was log<sub>e</sub> transformed.

Model 1: Model adjusted for age and sex.

Model 2: Model 1 + ethnicity + BMI + T2D + Smoking status (never, past, current) + Alcohol consumption (<1, 1-7,>7 drinks/week) + Education (low, medium, high) + SBP + homocysteine.

Model 3: Model 2 + ferritin + hemoglobin + MCV.

Model 4: Model 3 + TC/HDL-C ratio + glucose.

Model 5: Model 4 + cancer history + CVD history.

Model 6: Model 5 + eGFR + UAE.

Model 7: Model 6 + ALT + AST + ALP + GGT.
